# Supplementary material for: The C-terminal region of the oxidoreductase MIA40 stabilizes its cytosolic precursor during mitochondrial import
Source: PubMed Central journal article supplement (PMC7412830; doi:10.1186/s12915-020-00824-1), 2020-08-06
Supplement: 12915_2020_824_MOESM4_ESM.pdf [file 12915_2020_824_MOESM4_ESM.pdf]

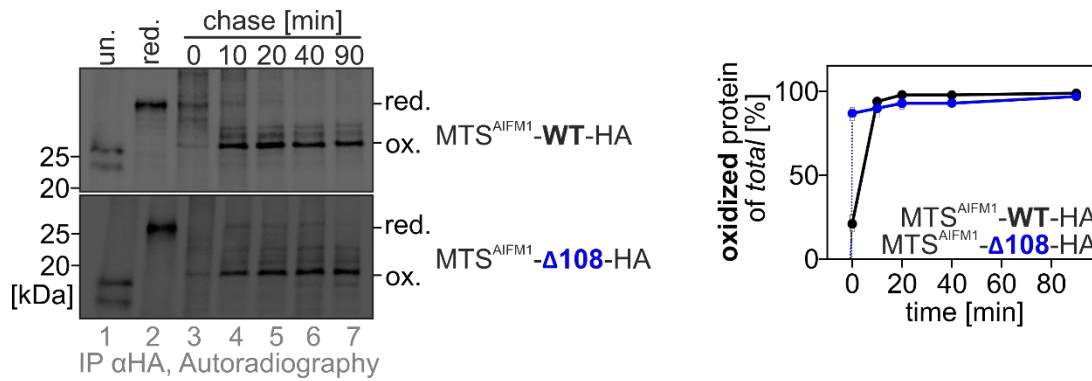

**ADDITIONAL FILE 4: Figure S4. In intact cells, MTS<sup>AIFM1</sup>-MIA40 variants are rapidly oxidized.**

Control *in cellulo* oxidation assay to follow oxidative folding of MTS<sup>AIFM1</sup>-MIA40 variants. Performed as described in **Figure 3E**. Oxidation of MTS<sup>AIFM1</sup> variants proceeds rapidly indicating rerouting of the IMS import pathway. Quantification using ImageQuantTL. Data from 2 experiments were combined.
