# Supplementary material for: The C-terminal region of the oxidoreductase MIA40 stabilizes its cytosolic precursor during mitochondrial import
Source: PubMed Central journal article supplement (PMC7412830; doi:10.1186/s12915-020-00824-1), 2020-08-06
Supplement: 12915_2020_824_MOESM5_ESM.pdf [file 12915_2020_824_MOESM5_ESM.pdf]

## ADDITIONAL FILE 5: Tabs S1-S3

| <b>Table S1</b>                                              |                                               |                                   |
|--------------------------------------------------------------|-----------------------------------------------|-----------------------------------|
| <b>Reagent/Resource</b>                                      | <b>Source</b>                                 | <b>Identifier</b>                 |
| <b>Antibodies</b>                                            |                                               |                                   |
| Mouse monoclonal anti-Strep (1:1000)                         | Abcam                                         | Cat# ab184224                     |
| Rabbit polyclonal anti-HA (1:1000)                           | Sigma-Aldrich                                 | Cat# SAB4300603; RRID:AB_10620829 |
| Rat monoclonal anti-HA (3F10; used for immunofluorescence)   | Roche                                         | Cat#11867423001; RRID:AB_10094468 |
| Mouse monoclonal anti-HA, agarose conjugate                  | Sigma-Aldrich                                 | Cat#A2095<br>RRID: AB_257974      |
| Mouse monoclonal anti-LDH (H-10) (1:1000)                    | Santa-Cruz                                    | Cat# sc-133123; RRID:AB_2134964   |
| Mouse monoclonal anti-PDH (1:1000)                           | Santa-Cruz                                    | Cat# sc-377092                    |
| Rabbit polyclonal anti-COX17 (1:1000)                        | Biorbyt                                       | Cat# orb160552                    |
| Rabbit polyclonal anti-COX6B1 (1:1000)                       | Sigma-Aldrich                                 | Cat# HPA004192, RRID:AB_1847180   |
| Rabbit polyclonal anti-NDUFB7 (1:1000)                       | Abcam                                         | Cat# ab188575                     |
| Rabbit polyclonal anti-NDUFS5 (1:1000)                       | Abcam                                         | Cat# ab179806                     |
| Rabbit polyclonal anti-NDUFA8 (1:1000)                       | Abcam                                         | Cat# ab184952                     |
| Rabbit polyclonal anti-NDUFB10 (1:1000)                      | Abcam                                         | Cat# ab196019                     |
| Rabbit polyclonal anti-CMC1 (1:1000)                         | Sigma-Aldrich                                 | Cat#HPA043333; RRID:AB_10797139   |
| Mouse monoclonal anti-HSP70 (1:1000)                         | Santa-Cruz                                    | Cat# sc-66048; RRID:AB_832518     |
| Rabbit polyclonal anti-TIMM9 (1:250)                         | This study                                    | N/A                               |
| Rabbit polyclonal anti-TIMM13 (1:1000)                       | Sigma-Aldrich                                 | Cat# HPA048985                    |
| Purified mouse anti-TIMM23 (1:1000)                          | BD Biosciences                                | Cat# 611223                       |
| Rabbit polyclonal anti-STARD7 (1:1000)                       | Proteintech                                   | Cat# 15689-1-AP                   |
| Rabbit polyclonal anti-MIA40 (1:1000)                        | Fischer et al., 2013,<br>Erdogan et al., 2018 | N/A                               |
| Goat anti-Mouse - Affinity Pure, HRP Conjugate               | ImmunoReagents                                | Cat# GtxMu-003-DHRPX              |
| Goat anti-Rabbit - Affinity Pure, HRP Conjugate              | ImmunoReagents                                | Cat# GtxRb-003-DHRPX              |
| Goat anti-Rat, Alexa Fluor 488                               | Invitrogen                                    | Cat# A-11006; RRID:AB_2534074     |
| Mitotracker red                                              | Thermo Fisher                                 | Cat# M22425                       |
| <b>Bacterial and Virus Strains</b>                           |                                               |                                   |
| One Shot™ TOP10 Chemically Competent <i>E. coli</i>          | Thermo Fisher                                 | Cat# C404010                      |
| Rosetta™ 2 (DE3) Singles™ Competent Cells                    | Novagen                                       | Cat# 70954-3                      |
| <b>Chemicals</b>                                             |                                               |                                   |
| MG132 (Z-Leu-Leu-Leu-al)                                     | Sigma-Aldrich                                 | Cat# C2211; CAS: 133407-82-6      |
| Emetine                                                      | Sigma-Aldrich                                 | Cat# E2375; CAS: 7083-71-8        |
| Methyl-PEG-Maleimide, mmPEG12                                | Thermo Fisher                                 | Cat# 22711                        |
| Methyl-PEG-Maleimide, mmPEG24                                | Thermo Fisher                                 | Cat# 22713                        |
| N-Ethylmaleimide (NEM)                                       | Sigma-Aldrich                                 | Ca# E3876; CAS: 128-53-0          |
| Tris(2-carboxyethyl)phosphine hydrochloride (Tris)           | Sigma-Aldrich                                 | Cat# C4706; CAS: 51805-45-9       |
| Doxycycline hyclate                                          | AppliChem                                     | Cat# A2951; CAS: 24390-14-5       |
| 4-Isopropylbenzoic acid (Cumate)                             | Sigma-Aldrich                                 | Cat# 268402; CAS: 536-66-3        |
| Puromycin                                                    | InvivoGen                                     | Cat# ant-pr-1                     |
| Hygromycin B solution from <i>Streptomyces hygroscopicus</i> | Sigma-Aldrich                                 | Cat# H0654; CAS: 31282-04-9       |
| Blasticidin                                                  | InvivoGen                                     | Cat# ant-bl-05                    |
| PrestoBlue™ Cell Viability Reagent                           | Invitrogen by Thermo Fisher                   | Cat# A13261                       |
| Digitonin                                                    | PanReac AppliChem                             | Cat# A1905                        |
| Benzonase® Nuclease                                          | Sigma-Aldrich                                 | Cat# E1014                        |
| <b>Critical Commercial Assays</b>                            |                                               |                                   |
| EasyTag EXPRESS 35S Protein Labeling Mix                     | Perkin-Elmer                                  | Cat# NEG772                       |
| TnT Quick Coupled Transcription/Translation System           | Promega                                       | Cat# L1170                        |
| GSTrap 4B column                                             | GE Healthcare                                 | Cat# 28401745                     |
| Superdex 16/600 75 pg High Load column                       | GE Healthcare                                 | Cat# 28989333                     |
| FuGENE® HD Transfection Reagent                              | Promega                                       | Cat# E2311                        |
| <b>Experimental Models: Cell Lines</b>                       |                                               |                                   |
| Human: Flp-In T-REx-293-cell lines – see Table S2            | Invitrogen                                    | Cat# R78007                       |
| Human: HEK293T-MIA40 CRISPR #2 MIA40 – see Table S2          | Habich et al., 2019                           | Habich et al., 2019               |
| Human: Flp-In T-REx-293 CRISPR ko YME1L1 – see Table S2      | Langer lab                                    |                                   |

| <b>Oligonucleotides</b>                                                                                  |                                                                        |                                                                                      |
|----------------------------------------------------------------------------------------------------------|------------------------------------------------------------------------|--------------------------------------------------------------------------------------|
| See Table S3                                                                                             |                                                                        |                                                                                      |
| <b>Recombinant DNA</b>                                                                                   |                                                                        |                                                                                      |
| <b>pcDNA5/FRT/TO Mammalian Expression Vector</b>                                                         | Invitrogen                                                             | Fischer et al., 2013                                                                 |
| <b>pOG44</b>                                                                                             | Invitrogen                                                             | Fischer et al., 2013                                                                 |
| <b>PB-CuO-MCS-IRES-GFP-EF1<math>\alpha</math>-CymR-Puro cDNA Inducible Cloning and Expression Vector</b> | System Biosciences                                                     | Cat# PBQM812A-1                                                                      |
| <b>Super PiggyBac Transposase Expression Vector</b>                                                      | System Biosciences                                                     | Cat# PB210PA-1                                                                       |
| <b>pGEX-6p-1</b>                                                                                         | GE Healthcare                                                          | Cat# 28954648                                                                        |
| <b>Software and Algorithms</b>                                                                           |                                                                        |                                                                                      |
| <b>Fiji (<i>Fiji Is Just ImageJ</i> 1.51n)</b>                                                           | Schindelin et al., 2012<br>Schneider et al., 2012                      | imagej.net/Fiji                                                                      |
| <b>Jalview 2.11.0</b>                                                                                    | Waterhouse et al., 2009                                                | jalview.org                                                                          |
| <b>PyMOL 2.3.4</b>                                                                                       | The PyMOL Molecular Graphics System, Version 1.2r3pr, Schrödinger, LLC | pymol.org                                                                            |
| <b>Image Lab 5.2</b>                                                                                     | Biorad Laboratories                                                    |                                                                                      |
| <b>ImageQuantTL 8.1</b>                                                                                  | GE Healthcare Life Sciences                                            |                                                                                      |
| <b>Clustal Omega</b>                                                                                     | Sievers and Higgins, 2018<br>Madeira et al., 2019                      |                                                                                      |
| <b>RCSB PDB</b>                                                                                          | Berman et al., 2000<br>Berman et al., 2003                             | <a href="http://rcsb.org">rcsb.org</a> , <a href="http://wwpdb.org">wwpdb.org</a>    |
| <b>JPred4</b>                                                                                            | Drozdetskiy et al., 2015                                               | <a href="http://www.compbio.dundee.ac.uk/jpred/">www.compbio.dundee.ac.uk/jpred/</a> |

| <b>Table S2</b>                                               |                |                                                               |                    |                      |  |
|---------------------------------------------------------------|----------------|---------------------------------------------------------------|--------------------|----------------------|--|
| <b>Cell lines</b>                                             | <b>Plasmid</b> | <b>Gene</b>                                                   | <b>TAG</b>         | <b>Reference</b>     |  |
| <b>Flp-In T-REx-293-Mock</b>                                  | pcDNA5/FRT/TO  | -                                                             | -                  | Fischer et al., 2013 |  |
| <b>Flp-In T-REx-293-MIA40 WT</b>                              | pcDNA5/FRT/TO  | ORF <i>MIA40</i>                                              | Strep (C-terminal) | Fischer et al., 2013 |  |
| <b>Flp-In T-REx-293-MIA40 Δ131</b>                            | pcDNA5/FRT/TO  | ORF <i>MIA40</i> Δ131-142                                     | Strep (C-terminal) | this study           |  |
| <b>Flp-In T-REx-293-MIA40 Δ122</b>                            | pcDNA5/FRT/TO  | ORF <i>MIA40</i> Δ122-142                                     | Strep (C-terminal) | this study           |  |
| <b>Flp-In T-REx-293-MIA40 Δ108</b>                            | pcDNA5/FRT/TO  | ORF <i>MIA40</i> Δ108-142                                     | Strep (C-terminal) | this study           |  |
| <b>Flp-In T-REx-293-MIA40 WT</b>                              | pcDNA5/FRT/TO  | ORF <i>MIA40</i>                                              | Strep (N-terminal) | this study           |  |
| <b>Flp-In T-REx-293-MIA40 Δ108</b>                            | pcDNA5/FRT/TO  | ORF <i>MIA40</i> Δ108-142                                     | Strep (N-terminal) | this study           |  |
| <b>Flp-In T-REx-293-MIA40 WT</b>                              | pcDNA5/FRT/TO  | ORF <i>MIA40</i>                                              | -                  | this study           |  |
| <b>Flp-In T-REx-293-MIA40 Δ131</b>                            | pcDNA5/FRT/TO  | ORF <i>MIA40</i> Δ131-142                                     | -                  | this study           |  |
| <b>Flp-In T-REx-293-MIA40 Δ122</b>                            | pcDNA5/FRT/TO  | ORF <i>MIA40</i> Δ122-142                                     | -                  | this study           |  |
| <b>Flp-In T-REx-293-MIA40 Δ108</b>                            | pcDNA5/FRT/TO  | ORF <i>MIA40</i> Δ108-142                                     | -                  | this study           |  |
| <b>Flp-In T-REx-293-MIA40 WT</b>                              | pcDNA5/FRT/TO  | ORF <i>MIA40</i>                                              | HA (C-terminal)    | this study           |  |
| <b>Flp-In T-REx-293-MIA40 Δ131</b>                            | pcDNA5/FRT/TO  | ORF <i>MIA40</i> Δ131-142                                     | HA (C-terminal)    | this study           |  |
| <b>Flp-In T-REx-293-MIA40 Δ122</b>                            | pcDNA5/FRT/TO  | ORF <i>MIA40</i> Δ122-142                                     | HA (C-terminal)    | this study           |  |
| <b>Flp-In T-REx-293-MIA40 Δ108</b>                            | pcDNA5/FRT/TO  | ORF <i>MIA40</i> Δ108-142                                     | HA (C-terminal)    | this study           |  |
| <b>Flp-In T-REx-293-MIA40 WT</b>                              | pcDNA5/FRT/TO  | ORF <i>MIA40</i>                                              | HA (N-terminal)    | this study           |  |
| <b>Flp-In T-REx-293-MIA40 Δ108</b>                            | pcDNA5/FRT/TO  | ORF <i>MIA40</i> Δ108-142                                     | HA (N-terminal)    | this study           |  |
| <b>Flp-In T-REx-293-MIA40 Δ108</b>                            | pcDNA5/FRT/TO  | ORF <i>MIA40</i> Δ1-40                                        | HA (C-terminal)    | this study           |  |
| <b>Flp-In T-REx-293-MIA40 Δ108 + 14 positively charged aa</b> | pcDNA5/FRT/TO  | ORF <i>MIA40</i> Δ108-142 + 14 positively charged aa          | -                  | this study           |  |
| <b>Flp-In T-REx-293-MIA40 Δ108 + 14 neutral charged aa</b>    | pcDNA5/FRT/TO  | ORF <i>MIA40</i> Δ108-142 + 14 positively charged aa          | -                  | this study           |  |
| <b>Flp-In T-REx-293-MIA40 Δ108 + GSS</b>                      | pcDNA5/FRT/TO  | ORF <i>MIA40</i> Δ108-142 + GSS                               | -                  | this study           |  |
| <b>Flp-In T-REx-293-MIA40 Δ131 + 12 positively charged aa</b> | pcDNA5/FRT/TO  | ORF <i>MIA40</i> Δ131-142 + 12 neutral charged aa             | -                  | this study           |  |
| <b>Flp-In T-REx-293-MIA40 Δ131 + 12 neutral charged aa</b>    | pcDNA5/FRT/TO  | ORF <i>MIA40</i> Δ131-142 + 12 neutral charged aa             | -                  | this study           |  |
| <b>Flp-In T-REx-293-MIA40 Δ131 + GSS</b>                      | pcDNA5/FRT/TO  | ORF <i>MIA40</i> Δ131-142 + GSS                               | -                  | this study           |  |
| <b>Flp-In T-REx-293-COX19</b>                                 | pcDNA5/FRT/TO  | ORF <i>COX19</i>                                              | HA (C-terminal)    | Fischer et al., 2013 |  |
| <b>Flp-In T-REx-293-COX19-C-MIA</b>                           | pcDNA5/FRT/TO  | ORF <i>COX19</i> + aa108-142 <i>MIA40</i>                     | HA (C-terminal)    | this study           |  |
| <b>Flp-In T-REx-293-COX19-C-neutral</b>                       | pcDNA5/FRT/TO  | ORF <i>COX19</i> + 35 neutral charged aa                      | HA (C-terminal)    | this study           |  |
| <b>Flp-In T-REx-293-COX19 4CS</b>                             | pcDNA5/FRT/TO  | ORF <i>COX19</i> (G89,119,152,182►C)                          | HA (C-terminal)    | Habich et al., 2019  |  |
| <b>Flp-In T-REx-293-COX19 4CS-C-MIA</b>                       | pcDNA5/FRT/TO  | ORF <i>COX19</i> (G89,119,152,182►C) + aa108-142 <i>MIA40</i> | HA (C-terminal)    | this study           |  |
| <b>Flp-In T-REx-293-COX19 4CS-C-neutral</b>                   | pcDNA5/FRT/TO  | ORF <i>COX19</i> (G89,119,152,182►C) + 35 neutral charged aa  | HA (C-terminal)    | this study           |  |

|                                                       |                                                 |                                             |                    |                          |
|-------------------------------------------------------|-------------------------------------------------|---------------------------------------------|--------------------|--------------------------|
| <b>Flp-In T-REx-293-AIF<sup>MTS</sup>-MIA40 WT</b>    | pcDNA5/FRT/TO                                   | ORF <i>AIF<sup>MTS</sup>-MIA40</i>          | -                  | this study               |
| <b>Flp-In T-REx-293-AIF<sup>MTS</sup>-MIA40 Δ108</b>  | pcDNA5/FRT/TO                                   | ORF <i>AIF<sup>MTS</sup>-MIA40 Δ108-142</i> | -                  | this study               |
| <b>Flp-In T-REx-293-SOD2</b>                          | pcDNA5/FRT/TO                                   | ORF <i>SOD2</i>                             | HA (C-terminal)    | this study               |
| <b>HEK293T</b>                                        | -                                               | -                                           | -                  | Habich et al., 2019      |
| <b>HEK293T MIA40 knockout #2-Mock</b>                 | PB-CuO-MCS- IRES-GFP-EF1α- CymR-Puro            | -                                           | -                  | Habich et al., 2019      |
| <b>HEK293T MIA40 knockout #2-MIA40 WT</b>             | PB-CuO-MCS- IRES-GFP-EF1α- CymR-Puro            | ORF <i>MIA40</i>                            | -                  | Habich et al., 2019      |
| <b>HEK293T MIA40 knockout #2-C53S</b>                 | PB-CuO-MCS- IRES-GFP-EF1α- CymR-Puro            | ORF <i>MIA40</i> (T157►G)                   | -                  | Habich et al., 2019      |
| <b>HEK293T MIA40 knockout #2-MIA40 Δ131</b>           | PB-CuO-MCS- IRES-GFP-EF1α- CymR-Puro            | ORF <i>MIA40 Δ131-142</i>                   | -                  | This study               |
| <b>HEK293T MIA40 knockout #2-MIA40 Δ122</b>           | PB-CuO-MCS- IRES-GFP-EF1α- CymR-Puro            | ORF <i>MIA40 Δ131-122</i>                   | -                  | This study               |
| <b>HEK293T MIA40 knockout #2-MIA40 Δ108</b>           | PB-CuO-MCS- IRES-GFP-EF1α- CymR-Puro            | ORF <i>MIA40 Δ131-108</i>                   | -                  | This study               |
| <b>Flp-In T-REx-293-YME1L1 ko</b>                     | -                                               | -                                           | -                  | Hartmann et al, 2016     |
| <b>Flp-In T-REx-293-YME1L1 ko-Mock</b>                | PB-CuO-MCS- IRES-GFP-EF1α- CymR-Puro            | -                                           | -                  | This study               |
| <b>Flp-In T-REx-293-YME1L1 ko-MIA40 WT</b>            | PB-CuO-MCS- IRES-GFP-EF1α- CymR-Puro MIA40 WR   | ORF <i>MIA40 WT</i>                         | -                  | This study               |
| <b>Flp-In T-REx-293-YME1L1 ko-MIA40 Δ108</b>          | PB-CuO-MCS- IRES-GFP-EF1α- CymR-Puro MIA40 Δ108 | ORF <i>MIA40 Δ108-142</i>                   | -                  | This study               |
| <b>Flp-In T-REx-293-YME1L1 ko + YME1L1</b>            | -                                               | -                                           | -                  | Hartmann et al, 2016     |
| <b>Flp-In T-REx-293-YME1L1 ko + YME1L1</b>            | PB-CuO-MCS- IRES-GFP-EF1α- CymR-Puro            | -                                           | -                  | This study               |
| <b>Flp-In T-REx-293-YME1L1 ko + YME1L1-MIA40</b>      | PB-CuO-MCS- IRES-GFP-EF1α- CymR-Puro MIA40 WR   | ORF <i>MIA40 WT</i>                         | -                  | This study               |
| <b>Flp-In T-REx-293-YME1L1 ko + YME1L1-MIA40 Δ108</b> | PB-CuO-MCS- IRES-GFP-EF1α- CymR-Puro MIA40 Δ108 | ORF <i>MIA40 Δ108-142</i>                   | -                  | This study               |
| <b>Flp-In T-REx-293</b>                               | -                                               | -                                           | -                  | Thermo Fisher Scientific |
| <b>Flp-In T-REx-293 -Mock</b>                         | PB-CuO-MCS- IRES-GFP-EF1α- CymR-Puro            | -                                           | -                  | This study               |
| <b>Flp-In T-REx-293 -MIA40 WT</b>                     | PB-CuO-MCS- IRES-GFP-EF1α- CymR-Puro MIA40 WR   | ORF <i>MIA40 WT</i>                         | -                  | This study               |
| <b>Flp-In T-REx-293 -MIA40 Δ108</b>                   | PB-CuO-MCS- IRES-GFP-EF1α- CymR-Puro MIA40 Δ108 | ORF <i>MIA40 Δ108-142</i>                   | -                  | This study               |
| <b>Rosetta2 (DE3)-MIA40 WT</b>                        | pGEX-6p-1                                       | ORF <i>MIA40</i>                            | GST (N-terminal)   | Friederich et al., 2017  |
| <b>Rosetta2 (DE3)-PreScission Protease</b>            | pGEX-6p-1                                       | ORF PreScission Protease                    | GST (N-terminal)   | Friederich et al., 2017  |
| <b>Rosetta2 (DE3)-MIA40 Δ131</b>                      | pGEX-6p-1                                       | ORF <i>MIA40 Δ131-142</i>                   | GST (N-terminal)   | this study               |
| <b>Rosetta2 (DE3)-MIA40 Δ122</b>                      | pGEX-6p-1                                       | ORF <i>MIA40 Δ122-142</i>                   | GST (N-terminal)   | this study               |
| <b>Rosetta2 (DE3)-MIA40 Δ108</b>                      | pGEX-6p-1                                       | ORF <i>MIA40 Δ108-142</i>                   | GST (N-terminal)   | this study               |
| <b>Rosetta2 (DE3)-MIA40 WT</b>                        | pRSET-A                                         | ORF <i>MIA40</i>                            | 6xHis (N-terminal) | this study               |
| <b>Rosetta2 (DE3)-MIA40 Δ108</b>                      | pRSET-A                                         | ORF <i>MIA40 Δ108-142</i>                   | 6xHis (N-terminal) | this study               |

| <b>Table S3</b>                                                                                                                                                                                                                                                                                               |                                                                               |                         |
|---------------------------------------------------------------------------------------------------------------------------------------------------------------------------------------------------------------------------------------------------------------------------------------------------------------|-------------------------------------------------------------------------------|-------------------------|
| <b>Oligonucleotides</b>                                                                                                                                                                                                                                                                                       | <b>Sequence (5'-3')</b>                                                       | <b>Restriction site</b> |
| <b>Fw for pcDNA5/FRT/TO MIA40 WT, MIA40 Δ131, MIA40 Δ122, MIA40 Δ108, MIA40 Δ131-Strep, MIA40 Δ122-Strep, MIA40 Δ108-Strep, MIA40-HA, MIA40 Δ131-HA, MIA40 Δ122-HA, MIA40 Δ108-HA, MIA40 108+14 pos. aa, MIA40 108+14 neut. aa, MIA40 108+GSS, MIA40 131+12 pos. aa, MIA40 131+12 neut. aa, MIA40 131+GSS</b> | GGCGGATCCGCAGCCATGTCCTATTGCCG                                                 | BamHI                   |
| <b>Rev for pcDNA5/FRT/TO MIA40 Δ131-Strep</b>                                                                                                                                                                                                                                                                 | CTACTCGAGTTATTTCTCAAATTTGTGGATGACTCCATC<br>CTCCAGCAATGGGAGCTGTTTCTTCTG        | XhoI                    |
| <b>Rev for pcDNA5/FRT/TO MIA40 Δ122-Strep</b>                                                                                                                                                                                                                                                                 | CTACTCGAGTTATTTCTCAAATTTGTGGATGACTCCATCCTCCAG<br>CTGCTGGCTTCTTCTCTTTCC        | XhoI                    |
| <b>Rev for pcDNA5/FRT/TO MIA40 Δ108-Strep</b>                                                                                                                                                                                                                                                                 | CAACTCGAGTTATTTCTCAAATTTGTGGATGACTCCATCCTCCAG<br>CTTGGGGATAGAGGTCTGGGTATTCTGC | XhoI                    |
| <b>Fw for pcDNA5/FRT/TO Strep-MIA40 WT, Strep-MIA40 Δ108</b>                                                                                                                                                                                                                                                  | ATTGGATCCGCAGCCATGTGGAGTCATCCACAATTTGAGAAAG<br>GAGCTTCTATTGCCGGCAGG           | BamHI                   |
| <b>Rev for pcDNA5/FRT/TO MIA40 WT, Strep-MIA40 WT, HA-MIA40 WT, AIF<sup>MTS</sup>-MIA40 WT</b>                                                                                                                                                                                                                | CGGCTCGAGTTAACTTGATCCCTCTCTTTGGTTGCAGTGG                                      | XhoI                    |
| <b>Rev for pcDNA5/FRT/TO MIA40 Δ108, Strep-MIA40 Δ108, HA-MIA40 Δ108, AIF<sup>MTS</sup>-MIA40 Δ108</b>                                                                                                                                                                                                        | CGGCTCGAGTTATTGGGGATAGAGGTCTGGGTATTCTGCATG<br>CATTC                           | XhoI                    |
| <b>Rev for pcDNA5/FRT/TO MIA40 Δ131</b>                                                                                                                                                                                                                                                                       | CGGCTCGAGTTAAATGGGAGCTGTTTCTTCTGCTTGTCTGC                                     | XhoI                    |
| <b>Rev for pcDNA5/FRT/TO MIA40 Δ122</b>                                                                                                                                                                                                                                                                       | CGGCTCGAGTTATGCTGGCTTCTTCTCTTTCTCTTCC                                         | XhoI                    |
| <b>Rev for pcDNA5/FRT/TO MIA40 WT-HA, MIA40 Δ40-HA</b>                                                                                                                                                                                                                                                        | GTACTCGAGTTAAGCATAATCTGGAACATCATATGGATATCCA<br>GCACTTGATCCCTCCTCTTC           | XhoI                    |
| <b>Fw for pcDNA5/FRT/TO MIA40 Δ40-HA</b>                                                                                                                                                                                                                                                                      | GATGGATCCGCAGCCATGGGATTGATACTGCCAAATGG                                        | BamHI                   |
| <b>Rev for pcDNA5/FRT/TO MIA40 Δ131-HA</b>                                                                                                                                                                                                                                                                    | GTACTCGAGTTAAGCATAATCTGGAACATCATATGGATATCCA<br>GCAATGGGAGCTGTTTCTTCTGC        | XhoI                    |
| <b>Rev for pcDNA5/FRT/TO MIA40 Δ122-HA</b>                                                                                                                                                                                                                                                                    | GTACTCGAGTTAAGCATAATCTGGAACATCATATGGATATCCA<br>GCTGCTGGCTTCTTCTCTTTCC         | XhoI                    |
| <b>Rev for pcDNA5/FRT/TO MIA40 Δ108-HA</b>                                                                                                                                                                                                                                                                    | GTACTCGAGTTAAGCATAATCTGGAACATCATATGGATATCCA<br>GCTTGGGGATAGAGGTCTGG           | XhoI                    |
| <b>Fw pcDNA5/FRT/TO HA-MIA40 WT, HA-MIA40 Δ108</b>                                                                                                                                                                                                                                                            | ATTGGATCCGCAGCCATGTATCCATATGATGTTCCAGATTATG<br>CTGGAGCTTCTATTGCCGGCAGGAAGG    | BamHI                   |
| <b>Rev for pcDNA5/FRT/TO MIA40 Δ108+14 pos. aa</b>                                                                                                                                                                                                                                                            | CTACTCGAGTTATGCTGGCTTCTTCTTCTCTTCTCTCTTCTCTT<br>TCTTCTCTTTGGGGATAGAGGTCTGGG   | XhoI                    |
| <b>Rev for pcDNA5/FRT/TO MIA40 Δ108+14 neut. aa</b>                                                                                                                                                                                                                                                           | ATACTCGAGTTATGCTGGTGAACCTGCAGCCCCTGAACCAGAA<br>GCTCCAGAAGCTTGGGGATAGAGGTCTGGG | XhoI                    |
| <b>Rev for pcDNA5/FRT/TO MIA40 Δ108+GSS</b>                                                                                                                                                                                                                                                                   | CGACTCGAGTTAACTTGATCCTTGGGGATAGAGGTCTGGGTA                                    | XhoI                    |
| <b>Rev for pcDNA5/FRT/TO MIA40 Δ131+12 pos. aa</b>                                                                                                                                                                                                                                                            | GTACTCGAGTTAACTTGATCCACGCTTACGCTTAGTAGCTGTTG<br>CCC GAATGGGAGCTGTTTCTTCTG     | XhoI                    |
| <b>Rev for pcDNA5/FRT/TO MIA40 Δ131+12 neut. aa</b>                                                                                                                                                                                                                                                           | GTACTCGAGTTAACTTGATCCTGACGACGAGTAGTAGCTGTT<br>GCAGCAATGGGAGCTGTTTCTTCTG       | XhoI                    |
| <b>Rev for pcDNA5/FRT/TO MIA40 Δ131+GSS</b>                                                                                                                                                                                                                                                                   | GTACTCGAGTTAACTTGATCCAAATGGGAGCTGTTTCTTCTGC                                   | XhoI                    |
| <b>Fw (1) for pcDNA5/FRT/TO COX19-C-MIA, pcDNA5/FRT/TO COX19-4SC-C-MIA, pcDNA5/FRT/TO COX19-C-neutral, pcDNA5/FRT/TO COX19-4SC-C-neutral</b>                                                                                                                                                                  | TATGGATCCGCCAACATGTCGACCGCCATGAATTC                                           | BamHI                   |
| <b>Fw (2) for pcDNA5/FRT/TO COX19-C-MIA, pcDNA5/FRT/TO COX19-4SC-C-MIA</b>                                                                                                                                                                                                                                    | GGAAAATCAGAGGCCAAAAAAGAGGATGAGGATGAGG                                         | -                       |
| <b>Rev (1) for pcDNA5/FRT/TO COX19-C-MIA, pcDNA5/FRT/TO COX19-4SC-C-MIA</b>                                                                                                                                                                                                                                   | CCTCATCTCATCTCTTTTTTGGCTCTGATTTCC                                             | -                       |
| <b>Rev (2) for pcDNA5/FRT/TO COX19-C-MIA, pcDNA5/FRT/TO COX19-4SC-C-MIA</b>                                                                                                                                                                                                                                   | GTACTCGAGTTAAGCATAATCTGGAACATCATATGGATATCCA<br>GCACTTGATCCCTCCTCTTC           | XhoI                    |
| <b>Fw (2) for pcDNA5/FRT/TO COX19-C-neutral,</b>                                                                                                                                                                                                                                                              | GGAAAATCAGAGGCCAAAAAAGCTTCTGGAGCTTCTGGTTCT                                    | -                       |
